# Supplementary material for: Effect of Electronic Health Record Clinical Decision Support on Contextualization of Care: A Randomized Clinical Trial
Source: PubMed Central journal article supplement (PMC9593230; doi:10.1001/jamanetworkopen.2022.38231), 2022-10-24
Supplement: jamanetwopen-e2238231-s001.pdf [file jamanetwopen-e2238231-s001.pdf]

1  
2 Integrating Contextual Factors into Clinical Decision Support to Reduce Contextual Error and  
3 Improve Outcomes in Ambulatory Care  
4

5 **Principal Investigator:**

6 Saul Weiner, Professor, UIC Departments of Medicine and Pediatrics, [sweiner@uic.edu](mailto:sweiner@uic.edu)

7 **Co-Investigators:**

8 Alan Schwartz, Professor, UIC Departments of Medical Education and Pediatrics,  
9 [alansz@uic.edu](mailto:alansz@uic.edu)

10 William Galanter, Assistant Professor of Clinical Medicine, UIC Department of Medicine,  
11 [billg@uic.edu](mailto:billg@uic.edu)

12 Karl Kochendorfer, Chief Health Information Officer, UIC Department of Family Medicine,  
13 [kkoche1@uic.edu](mailto:kkoche1@uic.edu)

14 Frances Weaver, Professor Professor, Public Health Sciences, Loyola University Chicago  
15 [fweaver@luc.edu](mailto:fweaver@luc.edu)

16 Aaron Michelfelder, Professor of Family Medicine, Bioethics & Health Policy, Loyola University  
17 Chicago  
18 [amichel@lumc.edu](mailto:amichel@lumc.edu)

19 Anita Varkey, Associate Professor of Medicine, Loyola University Chicago  
20 [anita.varkey@oakstreethealth.com](mailto:anita.varkey@oakstreethealth.com)

21 **Study Location(s):** UIC Primary Care Clinics, Loyola University Medical Center Primary Care  
22 Clinics  
23

24 **Sponsor:** Agency for Health Care Quality and Research (R01HS25374)  
25

26  
27 **Version:** 2

28 **Date:** 6/8/2017  
29  
30  
31  
32  
33  
34

35  
36  
37  
38  
39  
40  
41  
42  
43  
44  
45  
46  
47  
48  
49  
50  
51  
52  
53  
54  
55  
56  
57  
58  
59

## TABLE OF CONTENTS

|                                                            | Page |
|------------------------------------------------------------|------|
| Table of Contents.....                                     | 2    |
| List of Abbreviations.....                                 | 3    |
| 1.0 Project Summary/Abstract.....                          | 4    |
| 2.0 Background/Scientific Rationale.....                   | 6    |
| <b>3.0 Objectives/Aims</b> .....                           | 7    |
| <b>4.0 Eligibility</b> .....                               | 7    |
| <b>4.1 Inclusion Criteria</b> .....                        | 7    |
| <b>4.2 Exclusion Criteria</b> .....                        | 8    |
| <b>4.3 Excluded or Vulnerable Populations</b> .....        | 8    |
| <b>5.0 Subject Enrollment</b> .....                        | 8    |
| <b>6.0 Study Design and Procedures</b> .....               | 9    |
| <b>7.0 Expected Risks/Benefits</b> .....                   | 10   |
| <b>8.0 Data Collection and Management Procedures</b> ..... | 11   |
| <b>9.0 Data Analysis</b> .....                             | 12   |
| <b>10.0 Data and Safety Monitoring</b> .....               | 14   |
| <b>11.0 Regulatory Requirements</b> .....                  | 14   |
| 11.1 Informed Consent.....                                 | 15   |
| 11.2 Subject Confidentiality.....                          | 15   |
| 11.3 Unanticipated Problems.....                           | 16   |
| <b>12.0 References</b> .....                               | 17   |

## LIST OF ABBREVIATIONS

|    |       |                                                     |
|----|-------|-----------------------------------------------------|
| 60 |       |                                                     |
| 61 |       |                                                     |
| 62 | 4C    | Content Coding for Contextualization of Care        |
| 63 | CDS   | Clinical Decision Support system                    |
| 64 | COI   | Conflict of Interest                                |
| 65 | DHHS  | Department of Health and Human Services             |
| 66 | DMC   | Data Monitoring Committee                           |
| 67 | DSMB  | Data and Safety Monitoring Board                    |
| 68 | DSMP  | Data and Safety Monitoring Plan                     |
| 69 | HIPAA | Health Insurance Portability and Accountability Act |
| 70 | ICD   | Informed Consent Document                           |
| 71 | IRB   | Institutional Review Board                          |
| 72 | LAR   | Legally Authorized Representative                   |
| 73 | LUMC  | Loyola University Medical Center                    |
| 74 | OHRP  | Office of Human Research Protections                |
| 75 | OPRS  | Office for the Protection of Research Subjects      |
| 76 | PHI   | Protected Health Information                        |
| 77 | PI    | Principal Investigator                              |
| 78 | RA    | Research Assistant                                  |
| 79 | SAE   | Serious Adverse Event                               |
| 80 | USP   | Unannounced Standardized Patient                    |
| 81 |       |                                                     |

## 82 1.0 Project Summary/Abstract

83 The term *patient context* refers to the myriad *contextual factors* in patients' lives that  
84 complicate the application of research evidence to patient care.<sup>1</sup> For instance, the inability of a  
85 patient to afford a medication for a particular condition is a contextual factor. Contextual factors  
86 can be addressed when correctly identified. Substituting a low cost generic for a high cost brand  
87 name medication may enable a patient to afford a medication. Addressing contextual factors in  
88 a care plan is termed *contextualizing care*.<sup>2</sup> Conversely, the failure to address a contextual  
89 factor when it is feasible to do so is a *contextual error*, because it results in an inappropriate plan of  
90 care.<sup>3</sup> In sum, contextual errors are medical errors caused by inattention to patient context.  
91 They are common and linked to both diminished health care outcomes<sup>4</sup> and an increase in  
92 health care costs related to overuse and misuse of medical services.<sup>5</sup> These findings were  
93 determined using a validated method for coding audio recorded data called Content Coding for  
94 Contextualization of Care ("4C")<sup>6</sup> collected during the encounters by both real patients, and by  
95 unannounced standardized patients (USPs) employing checklists.<sup>7</sup>

96 Preventing contextual errors requires heightening clinician responsiveness to clues that  
97 there are contextual factors during the clinical encounter, in real time.<sup>8,9</sup> These clues, termed  
98 *contextual red flags* are evident in two sources: the medical record and from patients directly.<sup>10</sup>  
99 An unexpected increase in glycosylated hemoglobin is an example of the former; a patient's  
100 comment that they've recently been having episodes of hypoglycemia reflects the latter. An  
101 effective intervention would prompt clinicians to determine whether there are underlying  
102 contextual factors that could be addressed in the care plan, averting contextual error. This  
103 desirable process is termed *contextual probing*.<sup>6</sup>

104 While clinical decision support (CDS) has been used to provide physicians with timely  
105 biomedical information at the point of care to prevent errors<sup>11-13</sup> and promote appropriate care,<sup>14-</sup>  
106 <sup>16</sup> this technology also affords an opportunity to draw physician attention to both contextual red  
107 flags and contextual factors in order to avert contextual errors. The proposed study is submitted  
108 in response to Special Emphasis Notice (SEN) NOT-HS-16-015, "Advancing the Collection and  
109 Use of Patient-Reported Outcomes and Patient Contextual Data to Improve Quality and  
110 Outcomes in Ambulatory Care through Health Information Technology." We will assess the  
111 potential of "contextualized CDS" to improve contextualization of care through a randomized  
112 controlled intervention trial, with assessment measures of both patient health care outcomes  
113 and averted costs associated with overuse and misuse of medical services. In addition to  
114 pursuing the aforementioned aim, the study design will adopt best practices for CDS design. We  
115 propose to implement highly personalized, concise, actionable contextual CDS strategies. The  
116 proposed study will pursue these aims by testing three hypotheses about contextualized CDS,  
117 and adhering to one design principle. The three hypotheses are that CDS:

- 118 1. *Reduces contextual error*: CDS tools that inform clinicians of contextual factors and prompt  
119 them to explore contextual red flags should result in a reduction in contextual error.
- 120 2. *Improve health care outcomes*: Contextualized CDS predicts improved health care  
121 outcomes defined as a partial or full resolution of the contextual red flag (e.g. elevated HgB  
122 A1c) after the index visit.
- 123 3. *Reduces avoidable health care costs*: Contextualized CDS is associated with a reduction in  
124 misuse and overuse of inappropriate or unnecessary medical services.

125 The design principle, referred to as "*Five Right*"<sup>17</sup> is to provide the right information to the right  
126 people through the right channels in the right format at the right point in care delivery.

127 To test the hypotheses, patients who consent to participate will be randomized to usual  
128 care or care enhanced with contextualized CDS. Participants will audio record their visits, and

129 the data will be coded using 4C. They will be followed for 4-6 months following the index visit for  
130 assessment of outcomes using an established tracking method.<sup>6</sup> In addition, USPs presenting  
131 with cases containing complicating contextual factors that if overlooked result in overuse and  
132 misuse of medical services, will be employed to assess the third hypothesis, and to supplement  
133 the data obtained by observing the effects of contextual alerts on the care of real patients for the  
134 first hypothesis.

135 **2.0 Background/Scientific Rationale**

136 A *contextual error* occurs when a care plan is inappropriate because of inattention to  
137 patient context.<sup>1</sup> Increasing the dosage of a patient’s medication to manage deterioration of a  
138 chronic condition is a contextual error when the unaddressed underlying etiology is something in  
139 the patient’s circumstances, such as a change in health insurance coverage, loss of social  
140 support or competing responsibilities. Contextual errors are a subtype of medical error as they  
141 reflect “....a wrong plan to achieve an aim.”<sup>3</sup>

142 Our team has spent over a decade characterizing contextual errors (what they are and  
143 how to detect them ), assessing their prevalence in various practice settings, measuring their  
144 impact on health care outcomes and costs, and trying to prevent them.<sup>8,9</sup> For the latter we have  
145 attempted medical education interventions,<sup>4,18</sup> and performance improvement strategies  
146 employing audit & feedback.<sup>19</sup> A common theme of all of this work has been that contextual  
147 errors occur when physicians overlook essential information about patients’ circumstances and  
148 behaviors when planning their care, with measurably deleterious consequences for both health  
149 care outcomes and costs.<sup>20</sup> Reducing contextual error rates may require real time strategies,  
150 activated during the clinical encounter, that prompt physicians to explore and address patient  
151 context in care planning.

152 In our research employing real patient collected audio we learned that contextual errors  
153 are common. In a study in which 601 patients carried concealed audio recorders into their visits  
154 across multiple practice sites, we found that contextual red flags were present in 403 of visits  
155 (67%), and that contextual factors were revealed in 208, meaning that in 35% of encounters  
156 effective care required identifying and addressing a contextual factor.<sup>4</sup> Physicians were  
157 successful about 59% of the time, and responsible for a contextual error in the remaining 41%.  
158 In other words, about 14% (0.41 x 35%) of overall care was derailed by a contextual error.  
159 When we followed these patients for 9 months, the presenting problem at the time of the index  
160 visit was less likely to improve or resolve compared to visits without a contextual error (46% vs  
161 71%; *P*= 0.002).

162 In our research employing unannounced standardized patients (USPs), actors  
163 presenting to clinicians as patients and collecting audio recordings, we documented similar  
164 performance problems, with high contextual error rates.<sup>7</sup> These errors are caused either by  
165 inattention to contextual red flags – i.e. not noticing or responding to clues of underlying  
166 contextual factors, or not addressing contextual factors in care planning. The cases we  
167 developed were designed such that physicians were also challenged to avoid making  
168 biomedical errors, e.g. overlooking evidence of gastroesophageal reflux in a patient with asthma  
169 presenting with increased symptoms after meals and when recumbent. Before deploying USPs,  
170 the cases were iteratively refined until board certified physicians reviewing paper based  
171 versions had a low probability of making either a biomedical or contextual error when explicitly  
172 informed of the contextual factor. <sup>10</sup> In situ, however, contextual error rates turned out to be  
173 both common and more frequent than biomedical errors. In a subsequent analysis we added up  
174 the direct service utilization costs of these errors using Medicare cost-based reimbursement  
175 data, by tabulating the expenses associated with misuse and overuse of medical services.<sup>5</sup>  
176 Over 400 encounters, biomedical errors contributed a mean cost of \$30 per encounter, and  
177 contextual errors \$231 per encounter (Figure 2).

178 Clinical Decision Support (CDS) provides a set of strategies for both individualizing and  
179 timing heightened awareness of patient specific information to inform decision making. CDS  
180 integrates patient specific data with a knowledge base and interprets the resulting data with  
181 clinical rules and guidelines to provide support to clinicians at various points in the care

182 process.<sup>24</sup> CDS can interact with clinicians in a variety of ways, from interactive alerts to passive  
183 visualization that guides decisions without interrupting clinicians. It can be real time, or a  
184 message that can come at a more convenient time for non-urgent information.<sup>25</sup>

185 To date the knowledge base in CDS systems has been primarily biomedical information,  
186 such as laboratory data, pharmaceuticals, diagnosis, patient allergies, age, sex, etc... We  
187 propose incorporating contextual information into the CDS knowledge base to allow CDS  
188 interventions that help clinicians pick up on contextual red flags and prevent contextual errors.  
189 The approach would embrace the “Five Rights” framework already widely adopted in CDS  
190 design.<sup>17</sup> CDS interventions must provide the *right information*, to the *right people*, through the  
191 *right channels*, in the *right intervention formats*, at the *right points* in workflow.

192 In the following section, we outline a plan for incorporating and rigorously assessing  
193 patient contextual information (contextual red flags and contextual factors) into CDS, and  
194 assessing its impact on contextual error rates, health care outcomes and the misuse and  
195 overuse of medical services, drawing on methods of measurement developed, validated and  
196 extensively employed in our prior research. In addition to measuring the benefits of  
197 contextualized CDS, this project will focus on best design practices, such that the contextual  
198 information is presented in a manner that is relevant to those who can act on the information  
199 and that results in the right action.

200

### 201 **3.0 Objectives/Aims**

202 We will assess the potential of “contextualized CDS” to improve contextualization of care  
203 through a 27 month randomized controlled intervention trial, with assessment measures of both  
204 patient health care outcomes and averted costs associated with overuse and misuse of medical  
205 services. In addition to pursuing the aforementioned aim, the study design will adopt best  
206 practices for CDS design. We propose to implement highly personalized, concise, actionable  
207 contextual CDS strategies. The proposed study will pursue these aims by testing three  
208 hypotheses about contextualized CDS, and adhering to one design principle. The three  
209 hypotheses are that CDS:

- 210 1. *Reduces contextual error*: CDS tools that inform clinicians of contextual factors and  
211 prompt them to explore contextual red flags should result in a reduction in contextual  
212 error.
- 213 2. *Improve health care outcomes*: Contextualized CDS predicts improved health care  
214 outcomes defined as a partial or full resolution of the contextual red flag (e.g. elevated  
215 HgB A1c) after the index visit.
- 216 3. *Reduces avoidable health care costs*: Contextualized CDS is associated with a reduction  
217 in misuse and overuse of inappropriate or unnecessary medical services.

218

### 219 **4.0 Eligibility**

220

- *Subjects include:*

- 221 • 500 adult patients of primary clinics at UIC and Loyola Medical Center (LUMC)
- 222 (we estimate approaching 1700 patients to recruit 500)
- 223 • The clinicians (physicians or nurse practitioners) seeing the 500 patients (at least
- 224 20 clinicians and up to 200 clinicians)
- 225 • Maximum subjects under this protocol: 2000 patients, 200 clinicians

226

#### 227 **4.1 Inclusion Criteria**

- 228 • English-speaking adult patients presenting to outpatient primary care clinics
- 229 for scheduled appointments who can be contacted in advance of their

230 appointment and the clinicians (physicians or nurse practitioners) seeing  
231 those patients at those visits.

- 232 • Eligible patients and their clinicians are identified from scheduled clinic  
233 appointments

#### 234 **4.2 Exclusion Criteria**

- 235 • Patients with emergent or unscheduled visits or who do not speak English.

#### 236 **4.3 Excluded or Vulnerable Populations**

- 237 • Patients who do not speak English are excluded because previously developed  
238 tools for assessing context and contextualization are only available in English  
239 and our 4C coding system has only been applied in English
- 240 • Clinician subjects include UIC and LUMC employees.

#### 241 **5.0 Subject Enrollment**

- 242 • Clinicians: Clinicians will be informed of the study at their standing staff meetings. They'll  
243 be told that the purpose of the project is to assess whether enhanced clinical decision  
244 support, that provides both passive and actively delivered information provided by  
245 patients and extracted from their medication record about life challenges, or "contextual  
246 factors" that may be impacting their health care, can improve clinical decision making  
247 and health care outcomes and costs. They'll be informed that if they participate data  
248 collection will require listening in on the visit and that we will be inviting patients to audio  
249 record their visits. They'll also learn that this is a randomized study so that some of the  
250 time they'll see contextualized CDS information and other times they won't. They'll learn  
251 that they are not a unit of study, and we will be collecting no data about their individual  
252 performance. We'll also inform them that a decision not to participate will not impact their  
253 employment in any regard as we are a research team not connected to management.  
254 Those indicating they would like to participate will be contacted by an RA to complete  
255 the informed consent process
- 256 • Patients: The proposed protocol is that patients of participating physicians will be  
257 contacted about 2 weeks prior to a scheduled appointment to the adult primary care  
258 clinic at either of the two sites. Initial contact will be via mail with an opt out for a follow  
259 up phone call. If they don't opt out, the research assistant will call them. They will be  
260 informed that they are invited to participate in a study to determine whether providing  
261 their health care team with additional information in the electronic medical record about  
262 challenges or life circumstances they are facing that impact their care could improve the  
263 quality of their care, including their health outcomes. They will be informed that if they  
264 participate they will be asked and, assisted if needed, with completing a brief  
265 questionnaire for their medical record about challenges they are having that might  
266 impact their care. They'll also learn that when they arrive for their appointment they will  
267 receive a small digital audio record to carry into the visit. They'll be told that it is  
268 preferable to conceal the audio in their pocket or bag, but that they can take it out if they  
269 like. They'll be informed that their doctor supports the study. We also encourage all  
270 patients to turn off the audio recorder at any time if they change their mind about  
271 participation. Finally, they'll be informed that a member of the research team will access  
272 their record twice: first to note any information about their life situation that may be  
273 relevant to their health care now, and then several months later to see if key health care  
274 indicators noted at the visit have improved. Finally, they'll be told that their doctor may or  
275 may not receive the information they provided, based on random assignment. We have  
276  
277  
278



279 allocated \$20 to each patient participant and they'll be told that as well. Those who  
 280 consent to participate will sign the consent document when they arrive for the  
 281 appointment and are met by the RA. Only individuals who exhibit a full understanding of  
 282 the protocol, and indicate they are comfortable recording their visit, are eligible to do so.  
 283

284 **6.0 Study Design and Procedures**

285 The protocol for the proposed trial is as follows: (a) Patients are contacted by phone  
 286 approximately two weeks before a scheduled visit and invited to participate in a randomized  
 287 controlled study of whether augmenting clinician attention to information about their life  
 288 circumstances can result in higher quality care with better health care outcomes. (b) Among  
 289 those who consent to participate, prior to randomization, subjects complete a brief questionnaire  
 290 consisting of seven questions designed to elicit a broad range of contextual red flags, previously  
 291 developed and validated with funding from another study (appendix). An affirmative response to  
 292 any item prompts the respondent to then select one or more contextual factors if present. The  
 293 instrument will be a commercially available portal tethered to the EHR for data transfer. Those  
 294 who do not have web access will complete the instrument with the assistance of an RA over the  
 295 phone before their visit or, if necessary, when they report for their appointment. These data  
 296 upload (for both the intervention and control group) into the electronic medical record as  
 297 discrete variables. (c) For those randomized to the intervention, these contextual factors along  
 298 with contextual red flags already stored in the EHR will produce a variety of CDS, both passive  
 299 and interruptive alerts. For visits by patients in the control group, the CDS system will not  
 300 operate (d) Just prior to their appointment, in a private area near the waiting room, participants  
 301 will receive a small encrypted digital audio recorder to conceal in a bag, or eye glass case or  
 302 other common personal item. (e) As participants exit the visit, they return the audio recorder to  
 303 an RA who uploads the audio to a secure server.

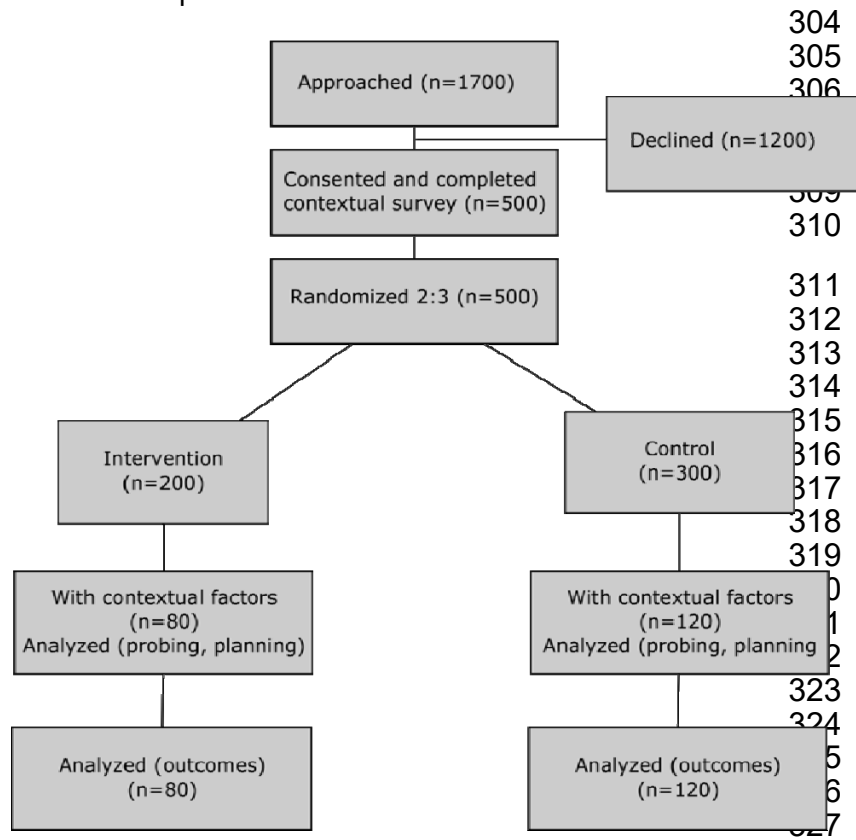

304  
 305  
 306 *Figure 1: Participant flow diagram for randomized trial of contextualized clinical decision support in real patients.*

311 Note that while patient  
 312 encounters will be  
 313 randomized, physicians will  
 314 not. Participating physicians  
 315 will provide care both with  
 316 and without contextualized  
 317 CDS. Hence there is no  
 318 specific physician sample  
 319 size required for this section  
 320 of the study.

321 *Randomization of unannounced standardized patients:*

322 There are four  
 323 reasons to employ USPs to  
 324 assess the impact of an  
 325  
 326  
 327

328 intervention (contextualized CDS) on overuse and misuse of medical services. First, they are by  
 329 definition standardized, meaning that physicians in both the control and intervention groups are  
 330 seeing the “same” patient.<sup>30</sup> This experimental approach enables apples-to-apples comparisons  
 331 (i.e. intrinsic risk adjustment) of clinical decision making, isolating the intervention as the sole  
 332 changing variable. Second they assess actual performance in practice, rather than just skills.<sup>22</sup>  
 333 The third reason is that USP cases can be designed around ambulatory presentations for which  
 334 there is evidence based consensus about what constitutes appropriate care.<sup>31</sup> For instance,  
 335 there is consensus that ordering radiographic studies on a patient presenting with  
 336 uncomplicated lower back pain is an overuse of medical services. Similarly, ordering a  
 337 malignancy work up on patient with weight loss in the setting of caloric deprivation is a misuse  
 338 of medical services. The fourth reason is that USPs scripts can be customized around the  
 339 particular CDS features we seek to assess. For instance, if we seek to assess whether alerts  
 340 designed to inform clinicians when their patients are not adhering to medications in the setting  
 341 of deteriorating chronic care management (e.g. a diabetic patients with elevated Accucheck  
 342 readings in their log book) reduce unnecessary consultation of specialists, prescribing of  
 343 additional medications etc...we will employ USP scripts that simulate such presentations.

344 For this project, 4 USP scripts with embedded contextual red flags and factors, drawn  
 345 from our library of such cases will be selected. Their training and deployment will be managed  
 346 by the UIC Graham Clinical Performance Center, which has extensive prior USP experience.<sup>7,32</sup>  
 347 The scripts will be modified and customized to assess the efficacy of the selected CDS  
 348 innovations such that failure of CDS to prevent inattention to contextual red flags or factors in  
 349 USP cases would result in a contextual error. Following the development of the 4 scripts, each  
 350 script will be portrayed at 10 control visits without CDS support and 10 intervention visits with  
 351 CDS support, divided across the two sites, for a total of 80 USP visits.  
 352

|                                                                                                         | Year 1 | Year 2 | Year 3 | Year 4 |
|---------------------------------------------------------------------------------------------------------|--------|--------|--------|--------|
| <b>Recruitment and Randomization of Real Patients</b>                                                   |        |        |        |        |
| Recruit 500 patients across two sites and assist with patient reported data entry (RA)                  |        |        |        |        |
| Collect and 4C code audio recorded data (Project Manager and RA)                                        |        |        |        |        |
| Collect Outcomes Data based on tracking outcomes of contextual red flags on 120 patients for 6-9 months |        |        |        |        |
| <b>Randomization and Deployment of USPs</b>                                                             |        |        |        |        |
| Identify and train 13 USPs (CPC)                                                                        |        |        |        |        |
| Conduct 80 USP visits                                                                                   |        |        |        |        |
| <b>Analysis</b>                                                                                         |        |        |        |        |
| Data analyses of contextual error rates, outcomes, and costs of overuse and misuse of medical services  |        |        |        |        |

353 *Table 1: Project Timeline*

354

355

356 **7.0 Expected Risks/Benefits**

357

358 **7.1 Expected Risks**

- 359
- 360
- 361
- 362
- 363
- 364
- 365
- 366
- 367
- 368
- 369
- 370
- 371
- Patients: The risks to patients are those that could be associated with any unintended dissemination of personal health information. A member of the research team, with patient consent, will access their medical record and will hear an audio recording of the patients encounter, collected by the patient. We have highly secure procedures and extensive experience avoiding any breach of PHI, using encryption for audio recorders, a secure server space approved for research data storage, and removal of patient identifiers when no longer needed for tracking outcomes (at about 4 months post index visit).
  - Clinicians: The risks to clinicians are those associate with any harm to reputation if they perform poorly and the encounter, captured on audio, were disseminated. We use encrypted audio, with data transfer directly to a secure research server space, and removal of identifiers when no longer needed for tracking.

372 *7.2 – Expected Benefits*

- 373
- 374
- 375
- 376
- 377
- 378
- 379
- 380
- 381
- 382
- 383
- 384
- 385
- 386
- Patients: We are conducting this study because we have prior evidence that indicates that patient have better health care outcome when clinicians address patient context in care planning. We hypothesize that providing contextual information via CDS will increase contextualization of care. Those patients in the intervention group may therefore receive better care. Those in the control group may also benefit from the exercise of completing a brief questionnaire that primes them to consider how their life challenges are impacting their health care.
  - Clinicians: Participating clinicians will benefit from clinical decision support that provides them with information about any life challenges patients in the intervention group are experiencing that may be relevant to care planning. In addition they'll receive CDS about how to use the information in care planning efficiently. For patients in the control group, clinicians will receive usual CDS.

387 **8.0 Data Collection and Management Procedures**

- 388
- 389
- 390
- 391
- 392
- 393
- 394
- 395
- 396
- 397
- 398
- 399
- 400
- 401
- 402
- 403
- 404
- 405
- 406
- 407
- Patients: Data for this study will come from 3 patients sources: (a) Their medical record. These are contextual red flags (e.g. missed appointments, loss of control of a chronic condition); (b) a patient completed inventory that is tethered to their electronic medical record, eliciting both contextual red flags and contextual factors that are not likely to be present in the EHR. See appendix for items; (c) Audio recordings they collect of their encounter, from which contextual red flags and contextual factors will be noted, and whether the care plan is contextualized or contextual errors are present. The extraction of all these data follow the Content Coding for Contextualization of Care (“4C”) methodology as described in the proposal and previously published. These data will be accessible to the research assistant, project manager, and PI who are trained 4C coders, in a format that contains identifiers (MRNs). However, once they have extracted the data and paired data from the EHR with the audio coded data, identifiers are removed and replaced with arbitrary codes. They do retain, however, a crosswalk file between codes and MRNs separate from the research data so that they can follow up on patient chart based outcomes for the presenting red flag 4-6 months post index visit; once chart outcomes are extracted and tagged with the code, the crosswalk file will be destroyed. Beyond the coding team, data is only shared without identifiers. We will employ encryption on all audio recorders, and audio is immediately uploaded to a

408 secure research data approved server using a USB port following the visit. Access to  
409 the medical record is conducted by an RA trained in the “4C” method, as detailed in  
410 the proposal, which requires extracting specific information onto a spread –  
411 contextual red flags and factors as outlined in the research plan and detailed in our  
412 online and cited coding manual. In addition the patients note is linked to their data  
413 using a cross-walk file accessible only to the RA, project manager and PI, and then  
414 discarded after outcomes data is collected at 4-6 months, and identifiers are no  
415 longer needed.

416

- 417 • Clinicians: Encounters rather than clinicians are the unit of interest for this study.  
418 There will not be sufficient data collection from any individual clinician to draw  
419 inferences about his or her performance. In fact, clinicians are not randomized in this  
420 study. The same clinician will see patients in both the intervention and control  
421 groups, with and without contextualized CDS. He or she will also see USPs with and  
422 without clinical decision support. Hence, we plan only to collect aggregate data on  
423 the participating clinicians, including age range, years in practice, gender, and  
424 whether they are trained in internal medicine, family medicine or as advance  
425 practices nurses. As described directly above, the audio recordings by patients of  
426 their visit with their doctor or APN will be encrypted and stored on a secure server  
427 space. Their voices may be heard on audio, however, and recognizable. Encryption  
428 means that only the 4C coders and PI will have the capacity to hear the audio. As  
429 doctors are not a unit of study, we do not plan to keep the names of doctors  
430 associated with data from their visits. The audio files will be stored until the date of  
431 the completion of the study which will be four years from the start date. The digital  
432 files will then be irreversibly deleted.

## 433

## 434

## 435 **9.0 Data Analysis**

436 *Hypothesis 1:* CDS tools that inform clinicians of contextual factors and prompt them to ask  
437 questions when there are contextual red flags should result in a reduction in contextual error.

438 From real patient encounters (i.e. observational assessment): Each visit is “Content  
439 Coded for Contextualization of Care” (“4C”).<sup>6</sup> 4C coding consists of reviewing the medical  
440 record and listening to the audio to identify the presence or absence of each of the four steps to  
441 contextualize care: Are there contextual red flags? If so, did the clinician probe them? If so, did  
442 the patient reveal contextual factors? Note that patients sometimes reveal contextual factors  
443 without a probe.<sup>33</sup> Regardless, did the clinician incorporate the contextual factor(s) into the care  
444 plan? 4C enables care plans to be classified as either contextualized or inappropriate because  
445 of a contextual error. In the latter instance, 4C also pinpoints the cause of the error as either  
446 secondary to a failure to probe a contextual red flag or failure to incorporate a contextual factor  
447 into the care plan. Hence, 4C coding will ascertain whether contextualized CDS is associated  
448 with a reduction in contextual error. And, when contextual error rates are reduced it will  
449 ascertain whether the reduction is associated with a higher probing rate or a higher rate of  
450 addressing contextual factors revealed without a probe into the care plan.

451 From USP encounters (i.e. experimental assessment): Does not require 4C  
452 coding; instead we use checklists based on evidence based criteria for appropriate vs  
453 inappropriate care. We will recruit USPs to present with 4 different scripts, with  
454 counterbalancing of control vs. intervention EHR rules and specific USP scripts among  
455 physicians, so that each physician sees 2 intervention USPs with the contextualized CDS rules

456 active and 2 control USPs with no contextualized CDS. As in our past work, likelihood of probing  
457 contextual red flags and contextualizing care will be tested using mixed effects logistic  
458 regression models to control for case differences and clustering of cases within physicians.  
459

460 *Hypothesis 2:* Contextualized CDS predicts improved health care outcomes defined as a  
461 resolution of the contextual error after the index visit.

462 This analysis is based exclusively on data generated from the real patient visits: 4C  
463 coding has been extensively utilized to track the resolution of contextual red flags. We've  
464 demonstrated in a research setting that contextualizing care does predict improved health care  
465 outcomes as defined by resolution or partial resolution of the presenting contextual red flag at 6-  
466 9 months following the index visit (with the range depending on timing of follow up visit or  
467 scheduled tests).<sup>4</sup> We propose to duplicate the methodology in this project, again tracking the  
468 status of the contextual red flags of patients seen at the index visit using a blind methodology,  
469 comparing those in the intervention group to the control. A detailed description of the process of  
470 scoring for outcomes based on contextualization of care is provided in the Content Coding for  
471 Contextualization of Care manual, publicly available.<sup>27</sup> As noted above, the outcome of interest  
472 is the disposition of the original contextual red flag when followed over time. The criteria for a  
473 good or poor outcome are prospectively determined, based on the original red flag, to avoid any  
474 bias resulting from knowledge of how the encounter gets coded. Determination of outcome is  
475 made blind to whether the index visit was coded as contextualized. A good outcome marks an  
476 improvement in the patient's condition as reflected in the contextual red flag. A poor outcome  
477 indicates no improvement in the contextual red flag.  
478

479 *Hypothesis 3:* Contextualized CDS is associated with a reduction in misuse and overuse of  
480 medical services.

481 This analysis is based exclusively on data generated from the USP visits, in which  
482 physicians in the usual care and contextualized CDS groups see sets of "identical" patients for  
483 which misuse and overuse of medical services has been pre-defined. Utilizing our previously  
484 published methods,<sup>5</sup> we will adopt the economic perspective of the patient and their third party  
485 payer, if any, with a time horizon of the expected consequences of care during the 30 days  
486 following the consultation. We consider only the direct consequences of care associated with  
487 diagnosis or misdiagnosis. We will not consider downstream costs beyond the initial  
488 recommendations from the consultation, and we will not consider societal costs not incurred by  
489 the patient or payer, such as lost productivity. We will include only resources related to the  
490 immediate diagnostic and therapeutic management at the index visit. Resources are direct  
491 medical costs in the case of unnecessary treatment and foregone direct medical costs in the  
492 case of under treatment.  
493

#### 494 *Sample size calculations*

495 *Real patients* (see Figure 5): Assuming, based on our prior research<sup>4</sup> and data from the audit &  
496 feedback program,<sup>19</sup> that contextual red flags with associated factors will be present in 50% of  
497 recorded visits, that 30% of patients approached will consent to participate, that physicians  
498 unaided will probe 50% of contextual red flags and that physicians unaided will contextualize  
499 care in 50% of visits with contextual factors, we propose to power the study for 80% power to  
500 detect an absolute increase in probe rate from 50% to 75% with contextualized CDS, and a  
501 corresponding increase in contextualization rates from 50% to 75%. Testing hypothesis 1  
502 requires 58 patients with identified contextual factors per group, and therefore at least 145  
503 patients consented and recorded per group. Testing hypothesis 2 requires at least 60  
504 contextualized care plans in the intervention group and 60 non-contextualized care plans in the  
505 control group, which we expect to achieve with 80 identified contextual factors in the

506 intervention group (requiring 192 recorded visits) and 120 identified contextual factors in the  
507 control group (requiring 288 recorded visits). Thus, to test all project hypotheses, we will  
508 approach and consent a sufficient number of patients (approximately 1600) to obtain recordings  
509 of 480 patients, randomize them to the intervention and control groups on a 2:3 basis (192  
510 intervention, 288 control), and expect to identify contextual factors associated with red flags in  
511 80 intervention and 120 control patients. As the primary care clinics at the participating sites see  
512 approximately 5,000 unique patients (UIC) and 25,000 (Loyola) annually, accrual is likely to  
513 require no more than 4-6 months.

514 *Sample size (USPs):* In our past work with USPs, physician made contextual errors  
515 approximately 80% of the time.<sup>7</sup> Assuming that the contextualized CDS enhances physician  
516 attention to red flags and leads them to probe substantially more often (e.g. increasing probe  
517 rate from 50% to 75%) and attend to identified information (e.g. increasing plan rate from 50%  
518 to 75%), we would expect overall contextual errors to occur no more than 45% of the time, and  
519 28 control and 28 intervention USP visits would provide 80% power to detect such a difference  
520 and test hypothesis 1.

521 In our past work, we found an overall median cost of error of \$194 when cases  
522 presented with contextual red flags, based on a median cost of \$231 when contextual errors  
523 occurred and a median cost of \$0 when contextual errors did not occur.<sup>5</sup> Based on bootstrapped  
524 simulation from our cost data in that study, 40 control and 40 intervention USP visits provide  
525 83% power to detect the expected cost reduction (a median of \$156) due to reduced contextual  
526 errors using a Wilcoxon rank-sum test with a significance level of  $p < .05$ . Accordingly, we will  
527 conduct 40 control and 40 intervention USP visits to provide sufficient power to test both study  
528 hypotheses. As the study comprises 4 USP visits (2 control, 2 intervention) per physician, we  
529 will recruit 20 physicians for this portion of the study.

530

### 531 **10.0 Data and Safety Monitoring**

532 We believe this study is minimal risk. However, to ensure the safety of research participants  
533 and to comply with NIH policies, a DSMB will be formed in early months of the project and  
534 given responsibility to review and approve study methods and analysis plan for the  
535 research. The DSMB will be organized by Dr. Weiner and will consist of senior, experienced  
536 clinicians and health services researchers. If deemed necessary by the IRB, the Principal  
537 Investigators will not be on the Data Safety and Monitoring Committee, thereby ensuring  
538 some level of independent review. When necessary, we will bring in experts from outside  
539 the project to serve on the committee. The DSMB will review interim data mid-way through  
540 the study using a predetermined stopping rule to determine whether the intervention group  
541 is being significantly benefitted (or harmed) over the control group and whether early  
542 stopping is necessary. In the rare event that an adverse event attributable to the CDS  
543 intervention is found, we will contact the patient's provider and document in the chart the  
544 potential error that was found.

545

546 One mid-trial (half of patients enrolled) comparison of rate of 4-6 month post-visit resolution  
547 of visit contextual red flag for intervention vs. control visits using a mixed effects logistic  
548 regression model with random effect of clinic/site and fixed effect of trial arm. An effect of  
549 trial arm that is significant at the  $p < .01$  level in either direction will trigger early stopping of  
550 additional recruiting (however, in patients already recruited who have completed the study  
551 visit, we will continue to obtain and analyze their 4-6 month post-visit medical records)

552

### 553 **11.0 Regulatory Requirements**

554  
555  
556  
557  
558  
559  
560  
561  
562  
563  
564  
565  
566  
567  
568  
569  
570  
571  
572  
573  
574  
575  
576  
577  
578  
579  
580

### 11.1 Informed Consent

- Patients: The proposed protocol is that patients will be contacted about 2 weeks prior to a scheduled appointment to the adult primary care clinic at either of the two sites. Initial contact will be via mail with an opt out for a follow up phone call. If they don't opt out, the research assistant will call them. They will be informed that they are invited to participate in a study to determine whether providing their health care team with additional information in the electronic medical record about challenges or life circumstances they are facing that impact their care could improve the quality of their care, including their health outcomes. They will be informed that if they participate they will be asked and, assisted if needed, with completing a brief questionnaire for their medical record about challenges they are having that might impact their care. They'll also learn that when they arrive for their appointment they will receive a small digital audio record to carry into the visit. They'll be told that it is preferable to conceal the audio in their pocket or bag, but that they can take it out if they like. They'll be informed that their doctor supports the study. We also encourage all patients to turn off the audio recorder at any time if they change their mind about participation. Finally, they'll be informed that a member of the research team will access their record twice: first to note any information about their life situation that may be relevant to their health care now, and then several months later to see if key health care indicators noted at the visit have improved. Finally, they'll be told that their doctor may or may not receive the information they provided, based on random assignment. We have allocated \$20 to each patient participant and they'll be told that as well. Those who consent to participate will sign the consent document when they arrive for the appointment and are met by the RA. If a patient is unable to participate fully in the informed consent process, there will be delegation to a representative. Only individuals who exhibit a full understanding of the protocol, and indicate they are comfortable recording their visit, are eligible to do so.

581  
582  
583  
584  
585  
586  
587  
588  
589  
590  
591  
592  
593  
594  
595

- Clinicians: Clinicians will be informed of the study at their standing staff meetings. They'll be told that the purpose of the project is to assess whether enhanced clinical decision support, that provides both passive and actively delivered information provided by patients and extracted from their medication record about life challenges, or "contextual factors" that may be impacting their health care, can improve clinical decision making and health care outcomes and costs. They'll be informed that if they participate data collection will require listening in on the visit and that we will be inviting patients to audio record their visits. They'll also learn that this is a randomized study so that some of the time they'll see contextualized CDS information and other times they won't. They'll learn that they are not a unit of study, and we will be collecting no data about their individual performance. We'll also inform them that a decision not to participate will not impact their employment in any regard as we are a research team not connected to management. Those indicating they would like to participate will be contacted by an RA to complete the informed consent process.

596  
597  
598  
599  
600

### 11.2 Subject Confidentiality

- Patients: Data for this study will come from 3 patient sources: (a) Their medical record. These are contextual red flags (e.g. missed appointments, loss of control of a chronic condition); (b) a patient completed inventory that is tethered to their electronic medical record, eliciting both contextual red flags and contextual factors

601 that are not likely to be present in the EHR. See appendix for items; (c) Audio  
602 recordings they collect of their encounter, from which contextual red flags and  
603 contextual factors will be noted, and whether the care plan is contextualized or  
604 contextual errors are present. The extraction of all these data follow the Content  
605 Coding for Contextualization of Care (“4C”) methodology as described in the  
606 proposal and previously published. These data will be accessible to the research  
607 assistant, project manager, and PI who are trained 4C coders, in a format that  
608 contains identifiers (MRNs). However, once they have extracted the data and paired  
609 data from the EHR with the audio coded data, identifiers are removed and replaced  
610 with arbitrary codes. They do retain, however, a crosswalk file between codes and  
611 MRNs separate from the research data so that they can follow up on patient chart  
612 based outcomes for the presenting red flag 4-6 months post index visit; once chart  
613 outcomes are extracted and tagged with the code, the crosswalk file will be  
614 destroyed. Beyond the coding team, data is only shared without identifiers. We will  
615 employ encryption on all audio recorders, and audio is immediately uploaded to a  
616 secure research data approved server using a USB port following the visit. Access to  
617 the medical record is conducted by an RA trained in the “4C” method, as detailed in  
618 the proposal, which requires extracting specific information onto a spread –  
619 contextual red flags and factors as outlined in the research plan and detailed in our  
620 online and cited coding manual. In addition, the patients note is linked to their data  
621 using a cross-walk file accessible only to the RA, project manager and PI, and then  
622 discarded after outcomes data is collected at 4-6 months, and identifiers are no  
623 longer needed.

624

- 625 • Clinicians: Encounters rather than clinicians are the unit of interest for this study.  
626 There will not be sufficient data collection from any individual clinician to draw  
627 inferences about his or her performance. In fact, clinicians are not randomized in this  
628 study. The same clinician will see patients in both the intervention and control  
629 groups, with and without contextualized CDS. He or she will also see USPs with and  
630 without clinical decision support. Hence, we plan only to collect aggregate data on  
631 the participating clinicians, including age range, years in practice, gender, and  
632 whether they are trained in internal medicine, family medicine or as advance  
633 practices nurses. As described directly above, the audio recordings by patients of  
634 their visit with their doctor or APN will be encrypted and stored on a secure server  
635 space. Their voices may be heard on audio, however, and recognizable. Encryption  
636 means that only the 4C coders and PI will have the capacity to hear the audio. As  
637 doctors are not a unit of study, we do not plan to keep the names of doctors  
638 associated with data from their visits.

### 639 **11.3 Unanticipated Problems**

640 • Unanticipated problems will be reported to the UIC IRB and the DSMB, as well  
641 as to the sponsor if required by conditions of the grant.  
642



643 **12.0 References**

- 644
- 645 1. Weiner SJ. Contextualizing medical decisions to individualize care: lessons from the  
646 qualitative sciences. *J Gen Intern Med.* 2004;19(3):281-285.
- 647 2. Weiner SJ. From research evidence to context: the challenge of individualizing care.  
648 *ACP J Club.* 2004;141(3):A11-12.
- 649 3. Weiner SJ. Contextual Error. In: Kattan M, ed. *Encyclopedia of Medical Decision*  
650 *Making.* SAGE; 2009:198-202.
- 651 4. Weiner SJ, Schwartz A, Sharma G, et al. Patient-centered decision making and health  
652 care outcomes: an observational study. *Ann Intern Med.* 2013;158(8):573-579.
- 653 5. Schwartz A, Weiner SJ, Weaver F, et al. Uncharted territory: measuring costs of  
654 diagnostic errors outside the medical record. *BMJ Qual Saf.* 2012.
- 655 6. Weiner SJ, Kelly B, Ashley N, et al. Content Coding for Contextualization of Care:  
656 Evaluating Physician Performance at Patient-Centered Decision Making. *Med Decis*  
657 *Making.* 2013.
- 658 7. Weiner SJ, Schwartz A, Weaver F, et al. Contextual errors and failures in individualizing  
659 patient care: a multicenter study. *Ann Intern Med.* 2010;153(2):69-75.
- 660 8. Weiner SJ SA. Contextual Errors in Medical Decision Making: Overlooked and  
661 Understudied. *Acad Med.* 2016;91(5):657-662.
- 662 9. Weiner SJ, Schwartz A. *Listening for what matters : avoiding contextual errors in health*  
663 *care.* Oxford ; New York: Oxford University Press; 2016.
- 664 10. Weiner SJ, Schwartz A, Yudkowsky R, et al. Evaluating physician performance at  
665 individualizing care: a pilot study tracking contextual errors in medical decision making.  
666 *Med Decis Making.* 2007;27(6):726-734.
- 667 11. Galanter WL, Bryson ML, Falck S, et al. Indication alerts intercept drug name confusion  
668 errors during computerized entry of medication orders. *PLoS One.* 2014;9(7):e101977.
- 669 12. Galanter W, Falck S, Burns M, Laragh M, Lambert BL. Indication-based prescribing  
670 prevents wrong-patient medication errors in computerized provider order entry (CPOE).  
671 *Journal of the American Medical Informatics Association : JAMIA.* 2013;20(3):477-481.
- 672 13. Galanter WL, Didomenico RJ, Polikaitis A. A trial of automated decision support alerts  
673 for contraindicated medications using computerized physician order entry. *Journal of the*  
674 *American Medical Informatics Association : JAMIA.* 2005;12(3):269-274.
- 675 14. Galanter WL, Thambi M, Rosencranz H, et al. Effects of clinical decision support on  
676 venous thromboembolism risk assessment, prophylaxis, and prevention at a university  
677 teaching hospital. *American journal of health-system pharmacy : AJHP : official journal*  
678 *of the American Society of Health-System Pharmacists.* 2010;67(15):1265-1273.
- 679 15. Galanter WL, Polikaitis A, DiDomenico RJ. A trial of automated safety alerts for inpatient  
680 digoxin use with computerized physician order entry. *Journal of the American Medical*  
681 *Informatics Association : JAMIA.* 2004;11(4):270-277.
- 682 16. Kucher N, Koo S, Quiroz R, et al. Electronic alerts to prevent venous thromboembolism  
683 among hospitalized patients. *N Engl J Med.* 2005;352(10):969-977.
- 684 17. Sirajuddin AM, Osheroff JA, Sittig DF, Chuo J, Velasco F, Collins DA. Implementation  
685 pearls from a new guidebook on improving medication use and outcomes with clinical  
686 decision support. Effective CDS is essential for addressing healthcare performance  
687 improvement imperatives. *J Healthc Inf Manag.* 2009;23(4):38-45.
- 688 18. Schwartz A, Weiner SJ, Harris IB, Binns-Calvey A. An educational intervention for  
689 contextualizing patient care and medical students' abilities to probe for contextual issues  
690 in simulated patients. *JAMA.* 2010;304(11):1191-1197.

- 691 19. Weiner SJ SA, Sharma G, Binns-Calvey A, Ashley N, Kelly B, Weaver FM. Patient  
692 collected audio for performance assessment of the clinical encounter. *Jt Comm J Qual*  
693 *Patient Saf.* 2015;42(6):273-278.
- 694 20. Weiner SJ, Schwartz A, Weaver F, et al. Overlooking Contextual Information When  
695 Individualizing Care: A Source of Medical Error and Avoidable Cost. *Journal of General*  
696 *Internal Medicine.* 2009;24:130-130.
- 697 21. Weiner SJ, Schwartz A. Directly Observed Care: Can Unannounced Standardized  
698 Patients Address a Gap in Performance Measurement? *J Gen Intern Med.* 2014.
- 699 22. Schwartz A, Weiner SJ, Binns-Calvey A. Comparing announced with unannounced  
700 standardized patients in performance assessment. *Jt Comm J Qual Patient Saf.*  
701 2013;39(2):83-88.
- 702 23. Ivers N, Jamtvedt G, Flottorp S, et al. Audit and feedback: effects on professional  
703 practice and healthcare outcomes. *Cochrane Database Syst Rev.* 2012(6):CD000259.
- 704 24. Beeler PE, Bates DW, Hug BL. Clinical decision support systems. *Swiss Med Wkly.*  
705 2014;144:w14073.
- 706 25. Osheroff JA, Healthcare Information and Management Systems Society. *Improving*  
707 *outcomes with clinical decision support : an implementer's guide.* 2nd ed. Chicago, IL:  
708 HIMSS; 2012.
- 709 26. Dawson J, Doll H, Fitzpatrick R, Jenkinson C, Carr AJ. The routine use of patient  
710 reported outcome measures in healthcare settings. *BMJ.* 2010;340:c186.
- 711 27. Weiner S, Ashley N, Binns-Calvey A, Kelly B, Sharma G, Schwartz A. . Content  
712 Coding for Contextualization of Care. Version 6.0. Harvard Dataverse Network Project  
713 [on line]. December 2014.
- 714 28. Phansalkar S, Desai A, Choksi A, et al. Criteria for assessing high-priority drug-drug  
715 interactions for clinical decision support in electronic health records. *BMC Med Inform*  
716 *Decis Mak.* 2013;13(1):65.
- 717 29. Tilson H, Hines LE, McEvoy G, et al. Recommendations for selecting drug-drug  
718 interactions for clinical decision support. *American journal of health-system pharmacy :*  
719 *AJHP : official journal of the American Society of Health-System Pharmacists.*  
720 2016;73(8):576-585.
- 721 30. Srinivasan M, Franks P, Meredith LS, Fiscella K, Epstein RM, Kravitz RL. Connoisseurs  
722 of care? Unannounced standardized patients' ratings of physicians. *Med Care.*  
723 2006;44(12):1092-1098.
- 724 31. Peabody JW, Luck J, Glassman P, Dresselhaus TR, Lee M. Comparison of vignettes,  
725 standardized patients, and chart abstraction: a prospective validation study of 3 methods  
726 for measuring quality. *JAMA.* 2000;283(13):1715-1722.
- 727 32. Dr. Allan L. and Mary L. Graham Clinical Performance Center.  
728 <http://chicago.medicine.uic.edu/grahamcpc/>.
- 729 33. Schwartz A, Weiner SJ, Binns-Calvey A, Frances M. Providers contextualise care more  
730 often when they discover patient context by asking: meta-analysis of three primary data  
731 sets. *Bmj Quality & Safety.* 2016;25(3):159-163.

732
