# Supplementary material for: Effect of Electronic Health Record Clinical Decision Support on Contextualization of Care: A Randomized Clinical Trial
Source: PubMed Central journal article supplement (PMC9593230; doi:10.1001/jamanetworkopen.2022.38231), 2022-10-24
Supplement: jamanetwopen-e2238231-s003.pdf [file jamanetwopen-e2238231-s003.pdf]

## Data Sharing Statement

Weiner. Effect of Electronic Health Record Clinical Decision Support on Contextualization of Care. *JAMA Netw Open*. Published October 24, 2022.

doi:10.1001/jamanetworkopen.2022.38231

### Data

**Data available:** Yes

**Data types:** Deidentified participant data

**How to access data:** Send requests to [sweiner@uic.edu](mailto:sweiner@uic.edu)

**When available:** With publication

### Supporting Documents

**Document types:** Statistical/analytic code

**How to access documents:** Send request to [sweiner@uic.edu](mailto:sweiner@uic.edu)

**When available:** With publication

### Additional Information

**Who can access the data:** researchers whose proposed use of the data has been approved

**Types of analyses:** for research purposes

**Mechanisms of data availability:** With investigator support
